# Supplementary material
Source: publisher figshare collection journal article supplement (https://acs.figshare.com/ndownloader/files/5124790)
Supplement: Supplementary file 1 [file 5124790]

 
data_um381s 
 # SUBMISSION DETAILS 
_publ_contact_author_name     'Dr. Ren, Tong' 
_publ_contact_author_address 
; Department of Chemistry 
  University of Miami 
  PO BOX 249118 
  Coral Gables, FL 33124-0431 
  USA 
; 
_publ_contact_author_email        tren@miami.edu 
_publ_contact_author_fax          '(305) 284-1880' 
_publ_contact_author_phone        '(305) 284-6617' 
_publ_requested_journal           '?' 
_journal_name_full                '?' 
_journal_year                     2005 
_journal_volume                   ? 
_journal_issue                    '?' 
_journal_page_first               ? 
_journal_page_last                ? 
  
_publ_section_title 
; 
? 
; 
_publ_section_abstract    'N/A' 
  
loop_ 
_publ_author_name 
_publ_author_address 
  'Ren, Tong' 
; Department of Chemistry 
  University of Miami 
  PO BOX 249118 
  Coral Gables, FL 33124-0431 
  USA 
; 
_audit_creation_method            SHELXL-97 
_chemical_name_systematic 
; 
 ? 
; 
_chemical_name_common             ? 
_chemical_melting_point           ? 
_chemical_formula_moiety          ? 
_chemical_formula_sum 
 'C30 H30 N4 O4 S2' 
_chemical_formula_weight          574.70 
 
loop_ 
 _atom_type_symbol 
 _atom_type_description 
 _atom_type_scat_dispersion_real 
 _atom_type_scat_dispersion_imag 
 _atom_type_scat_source 
 'C'  'C'   0.0033   0.0016 
 'International Tables Vol C Tables 4.2.6.8 and 6.1.1.4' 
 'H'  'H'   0.0000   0.0000 
 'International Tables Vol C Tables 4.2.6.8 and 6.1.1.4' 
 'N'  'N'   0.0061   0.0033 
 'International Tables Vol C Tables 4.2.6.8 and 6.1.1.4' 
 'O'  'O'   0.0106   0.0060 
 'International Tables Vol C Tables 4.2.6.8 and 6.1.1.4' 
 'S'  'S'   0.1246   0.1234 
 'International Tables Vol C Tables 4.2.6.8 and 6.1.1.4' 
 
_symmetry_cell_setting            Triclinic 
_symmetry_space_group_name_H-M    P-1 
 
loop_ 
 _symmetry_equiv_pos_as_xyz 
 'x, y, z' 
 '-x, -y, -z' 
 
_cell_length_a                    11.3150(6) 
_cell_length_b                    11.7401(7) 
_cell_length_c                    11.9111(7) 
_cell_angle_alpha                 81.0720(10) 
_cell_angle_beta                  70.8580(10) 
_cell_angle_gamma                 71.0900(10) 
_cell_volume                      1411.98(14) 
_cell_formula_units_Z             2 
_cell_measurement_temperature     300(2) 
_cell_measurement_reflns_used     3335
_cell_measurement_theta_min       2.26 
_cell_measurement_theta_max       27.11 
 
_exptl_crystal_description        Plate 
_exptl_crystal_colour             Yellowish green 
_exptl_crystal_size_max           0.33 
_exptl_crystal_size_mid           0.25 
_exptl_crystal_size_min           0.04 
_exptl_crystal_density_meas       ? 
_exptl_crystal_density_diffrn     1.352 
_exptl_crystal_density_method     'not measured' 
_exptl_crystal_F_000              604 
_exptl_absorpt_coefficient_mu     0.232 
_exptl_absorpt_correction_type    empirical 
_exptl_absorpt_correction_T_min   0.847086 
_exptl_absorpt_correction_T_max   1.000000 
_exptl_absorpt_process_details     
; 
  SADABS, Absorption corrections using Bruker CCD based on the method of 
  Bob Blessing.  Acta Cryst. 1995, A51, 33 
;  
_exptl_special_details 
; 
 ? 
; 
 
_diffrn_ambient_temperature       300(2) 
_diffrn_radiation_wavelength      0.71073 
_diffrn_radiation_type            MoK\a 
_diffrn_radiation_source          'fine-focus sealed tube' 
_diffrn_radiation_monochromator   graphite 
_diffrn_measurement_device_type   'CCD area detector' 
_diffrn_measurement_method        'phi and omega scans' 
_diffrn_detector_area_resol_mean  ? 
_diffrn_standards_number          ? 
_diffrn_standards_interval_count  ? 
_diffrn_standards_interval_time   ? 
_diffrn_standards_decay_%         ? 
_diffrn_reflns_number             7517 
_diffrn_reflns_av_R_equivalents   0.0224 
_diffrn_reflns_av_sigmaI/netI     0.0380 
_diffrn_reflns_limit_h_min        -13 
_diffrn_reflns_limit_h_max        11 
_diffrn_reflns_limit_k_min        -13 
_diffrn_reflns_limit_k_max        13 
_diffrn_reflns_limit_l_min        -14 
_diffrn_reflns_limit_l_max        13 
_diffrn_reflns_theta_min          1.81 
_diffrn_reflns_theta_max          25.00 
_reflns_number_total              4914 
_reflns_number_gt                 3390 
_reflns_threshold_expression      >2sigma(I) 
 
_computing_data_collection        'Bruker SMART' 
_computing_cell_refinement        'Bruker SMART' 
_computing_data_reduction         'Bruker SAINT' 
_computing_structure_solution     'SHELXS-97 (Sheldrick, 1990)' 
_computing_structure_refinement   'SHELXL-97 (Sheldrick, 1997)' 
_computing_molecular_graphics     'Bruker SHELXTL' 
_computing_publication_material   'Bruker SHELXTL'
 
_refine_special_details 
; 
 Refinement of F^2^ against ALL reflections.  The weighted R-factor wR and 
 goodness of fit S are based on F^2^, conventional R-factors R are based 
 on F, with F set to zero for negative F^2^. The threshold expression of 
 F^2^ > 2sigma(F^2^) is used only for calculating R-factors(gt) etc. and is 
 not relevant to the choice of reflections for refinement.  R-factors based 
 on F^2^ are statistically about twice as large as those based on F, and R- 
 factors based on ALL data will be even larger. 
; 
 
_refine_ls_structure_factor_coef  Fsqd  
_refine_ls_matrix_type            full 
_refine_ls_weighting_scheme       calc  
_refine_ls_weighting_details 
 'calc w=1/[\s^2^(Fo^2^)+(0.0575P)^2^+0.0000P] where P=(Fo^2^+2Fc^2^)/3' 
_atom_sites_solution_primary      direct 
_atom_sites_solution_secondary    difmap 
_atom_sites_solution_hydrogens    geom 
_refine_ls_hydrogen_treatment     mixed 
_refine_ls_extinction_method      none 
_refine_ls_extinction_coef        ? 
_refine_ls_number_reflns          4914 
_refine_ls_number_parameters      361 
_refine_ls_number_restraints      0 
_refine_ls_R_factor_all           0.0584 
_refine_ls_R_factor_gt            0.0393 
_refine_ls_wR_factor_ref          0.1063 
_refine_ls_wR_factor_gt           0.0996 
_refine_ls_goodness_of_fit_ref    1.003 
_refine_ls_restrained_S_all       1.003 
_refine_ls_shift/su_max           0.000 
_refine_ls_shift/su_mean          0.000 
 
loop_ 
 _atom_site_label 
 _atom_site_type_symbol 
 _atom_site_fract_x 
 _atom_site_fract_y 
 _atom_site_fract_z 
 _atom_site_U_iso_or_equiv 
 _atom_site_adp_type 
 _atom_site_occupancy 
 _atom_site_symmetry_multiplicity 
 _atom_site_calc_flag 
 _atom_site_refinement_flags 
 _atom_site_disorder_assembly 
 _atom_site_disorder_group 
S1 S 0.44365(6) 0.41642(5) 0.38408(5) 0.05182(18) Uani 1 1 d . . . 
S2 S 0.58256(6) 0.19950(6) 0.79159(5) 0.05564(18) Uani 1 1 d . . . 
N1 N 0.45907(17) 0.31509(15) 0.49245(16) 0.0512(5) Uani 1 1 d . . . 
H1A H 0.4074 0.3343 0.5624 0.061 Uiso 1 1 calc R . . 
N2 N 0.60268(17) 0.23673(15) 0.65100(14) 0.0495(4) Uani 1 1 d . . . 
H2A H 0.6033 0.3095 0.6268 0.059 Uiso 1 1 calc R . . 
N3 N -0.01239(17) 0.25855(16) 0.28488(17) 0.0541(5) Uani 1 1 d . . . 
N4 N -0.0295(2) 0.21461(19) 0.9225(2) 0.0711(6) Uani 1 1 d . . . 
O1 O 0.57018(15) 0.41049(14) 0.30169(16) 0.0688(5) Uani 1 1 d . . . 
O2 O 0.36795(16) 0.52634(12) 0.44315(15) 0.0654(5) Uani 1 1 d . . . 
O3 O 0.68695(16) 0.09648(16) 0.80722(14) 0.0724(5) Uani 1 1 d . . . 
O4 O 0.56175(16) 0.30833(16) 0.84480(14) 0.0683(5) Uani 1 1 d . . . 
C1 C 0.5497(2) 0.19819(18) 0.48235(17) 0.0433(5) Uani 1 1 d . . . 
C2 C 0.5678(2) 0.12365(19) 0.39446(19) 0.0555(6) Uani 1 1 d . . . 
H2C H 0.5225 0.1514 0.3383 0.067 Uiso 1 1 calc R . . 
C3 C 0.6527(3) 0.0088(2) 0.3906(2) 0.0626(6) Uani 1 1 d . . . 
H3B H 0.6652 -0.0408 0.3314 0.075 Uiso 1 1 calc R . . 
C4 C 0.7188(3) -0.0326(2) 0.4735(2) 0.0664(7) Uani 1 1 d . . . 
H4B H 0.7747 -0.1109 0.4714 0.080 Uiso 1 1 calc R . . 
C5 C 0.7033(2) 0.04030(19) 0.5597(2) 0.0566(6) Uani 1 1 d . . . 
H5A H 0.7496 0.0115 0.6150 0.068 Uiso 1 1 calc R . . 
C6 C 0.6193(2) 0.15639(17) 0.56518(17) 0.0420(5) Uani 1 1 d . . . 
C7 C 0.3526(2) 0.37945(17) 0.30770(19) 0.0462(5) Uani 1 1 d . . . 
C8 C 0.4049(2) 0.3755(2) 0.1871(2) 0.0579(6) Uani 1 1 d . . . 
H8A H 0.4861 0.3885 0.1500 0.070 Uiso 1 1 calc R . . 
C9 C 0.3359(2) 0.3518(2) 0.1191(2) 0.0632(6) Uani 1 1 d . . . 
H9A H 0.3694 0.3530 0.0366 0.076 Uiso 1 1 calc R . . 
C10 C 0.2210(2) 0.3272(2) 0.1730(2) 0.0557(6) Uani 1 1 d . . . 
H10A H 0.1770 0.3109 0.1265 0.067 Uiso 1 1 calc R . . 
C11 C 0.1651(2) 0.32573(17) 0.29927(18) 0.0450(5) Uani 1 1 d . . . 
C12 C 0.22915(19) 0.35891(16) 0.36821(18) 0.0421(5) Uani 1 1 d . . . 
C13 C 0.1648(2) 0.37348(18) 0.49251(19) 0.0500(5) Uani 1 1 d . . . 
H13A H 0.2037 0.3969 0.5392 0.060 Uiso 1 1 calc R . . 
C14 C 0.0467(2) 0.35291(19) 0.5420(2) 0.0530(6) Uani 1 1 d . . . 
H14A H 0.0039 0.3651 0.6224 0.064 Uiso 1 1 calc R . . 
C15 C -0.0122(2) 0.31379(19) 0.4749(2) 0.0541(6) Uani 1 1 d . . . 
H15A H -0.0922 0.2986 0.5122 0.065 Uiso 1 1 calc R . . 
C16 C 0.0451(2) 0.29725(17) 0.3555(2) 0.0477(5) Uani 1 1 d . . . 
C17 C 0.0607(3) 0.1423(2) 0.2342(3) 0.0778(8) Uani 1 1 d . . . 
H17A H 0.1511 0.1390 0.1991 0.117 Uiso 1 1 calc R . . 
H17B H 0.0261 0.1316 0.1743 0.117 Uiso 1 1 calc R . . 
H17C H 0.0532 0.0794 0.2958 0.117 Uiso 1 1 calc R . . 
C18 C -0.1500(2) 0.2649(3) 0.3376(3) 0.0800(8) Uani 1 1 d . . . 
H18A H -0.1977 0.3418 0.3712 0.120 Uiso 1 1 calc R . . 
H18B H -0.1584 0.2020 0.3990 0.120 Uiso 1 1 calc R . . 
H18C H -0.1847 0.2550 0.2774 0.120 Uiso 1 1 calc R . . 
C19 C 0.4389(2) 0.15259(19) 0.83978(18) 0.0497(5) Uani 1 1 d . . . 
C20 C 0.4541(3) 0.0332(2) 0.87222(19) 0.0589(6) Uani 1 1 d . . . 
H20A H 0.5373 -0.0193 0.8662 0.071 Uiso 1 1 calc R . . 
C21 C 0.3457(3) -0.0104(2) 0.9143(2) 0.0648(7) Uani 1 1 d . . . 
H21A H 0.3566 -0.0913 0.9390 0.078 Uiso 1 1 calc R . . 
C22 C 0.2241(3) 0.0647(2) 0.91952(19) 0.0571(6) Uani 1 1 d . . . 
H22A H 0.1528 0.0342 0.9483 0.069 Uiso 1 1 calc R . . 
C23 C 0.2036(2) 0.18790(19) 0.88228(18) 0.0491(5) Uani 1 1 d . . . 
C24 C 0.3126(2) 0.23529(18) 0.84373(17) 0.0469(5) Uani 1 1 d . . . 
C25 C 0.2903(2) 0.36091(19) 0.8143(2) 0.0543(6) Uani 1 1 d . . . 
H25A H 0.3600 0.3936 0.7873 0.065 Uiso 1 1 calc R . . 
C26 C 0.1659(3) 0.4331(2) 0.8259(2) 0.0651(7) Uani 1 1 d . . . 
H26A H 0.1516 0.5157 0.8095 0.078 Uiso 1 1 calc R . . 
C27 C 0.0592(3) 0.3872(2) 0.8615(2) 0.0677(7) Uani 1 1 d . . . 
H27A H -0.0241 0.4394 0.8677 0.081 Uiso 1 1 calc R . . 
C28 C 0.0753(2) 0.2660(2) 0.8877(2) 0.0568(6) Uani 1 1 d . . . 
C29 C -0.0302(3) 0.1436(3) 0.8317(3) 0.0847(9) Uani 1 1 d . . . 
H29A H 0.0558 0.0895 0.8007 0.127 Uiso 1 1 calc R . . 
H29B H -0.0554 0.1968 0.7683 0.127 Uiso 1 1 calc R . . 
H29C H -0.0913 0.0979 0.8667 0.127 Uiso 1 1 calc R . . 
C30 C -0.1595(3) 0.2979(3) 0.9706(4) 0.1267(14) Uani 1 1 d . . . 
H30A H -0.1576 0.3435 1.0301 0.190 Uiso 1 1 calc R . . 
H30B H -0.2214 0.2531 1.0058 0.190 Uiso 1 1 calc R . . 
H30C H -0.1847 0.3520 0.9077 0.190 Uiso 1 1 calc R . . 
 
loop_ 
 _atom_site_aniso_label 
 _atom_site_aniso_U_11 
 _atom_site_aniso_U_22 
 _atom_site_aniso_U_33 
 _atom_site_aniso_U_23 
 _atom_site_aniso_U_13 
 _atom_site_aniso_U_12 
S1 0.0536(4) 0.0432(3) 0.0691(4) -0.0001(3) -0.0322(3) -0.0151(3) 
S2 0.0542(4) 0.0753(4) 0.0433(3) -0.0020(3) -0.0209(3) -0.0208(3) 
N1 0.0507(11) 0.0501(10) 0.0499(11) -0.0079(8) -0.0221(9) -0.0015(9) 
N2 0.0595(11) 0.0522(10) 0.0415(10) 0.0004(8) -0.0174(9) -0.0217(9) 
N3 0.0419(10) 0.0535(11) 0.0690(13) -0.0132(9) -0.0169(9) -0.0119(9) 
N4 0.0560(13) 0.0795(14) 0.0825(15) -0.0192(12) -0.0086(11) -0.0313(12) 
O1 0.0549(10) 0.0745(11) 0.0832(12) 0.0114(9) -0.0265(9) -0.0282(9) 
O2 0.0736(11) 0.0406(9) 0.0928(12) -0.0098(8) -0.0436(10) -0.0090(8) 
O3 0.0582(10) 0.0961(12) 0.0586(10) 0.0085(9) -0.0309(9) -0.0092(10) 
O4 0.0687(11) 0.0941(12) 0.0559(10) -0.0202(9) -0.0188(8) -0.0344(10) 
C1 0.0424(12) 0.0425(11) 0.0433(12) -0.0037(9) -0.0119(10) -0.0104(10) 
C2 0.0681(16) 0.0522(14) 0.0491(13) -0.0054(10) -0.0225(12) -0.0151(12) 
C3 0.0842(18) 0.0481(14) 0.0495(14) -0.0104(11) -0.0154(13) -0.0125(13) 
C4 0.0796(18) 0.0408(13) 0.0626(16) -0.0040(11) -0.0170(14) 0.0001(13) 
C5 0.0606(15) 0.0516(13) 0.0510(14) 0.0053(11) -0.0195(12) -0.0084(12) 
C6 0.0420(12) 0.0432(12) 0.0387(11) -0.0004(9) -0.0092(9) -0.0136(10) 
C7 0.0458(12) 0.0431(12) 0.0511(13) 0.0001(10) -0.0193(11) -0.0110(10) 
C8 0.0472(13) 0.0725(16) 0.0540(15) 0.0012(12) -0.0125(11) -0.0221(12) 
C9 0.0548(15) 0.0896(18) 0.0448(13) -0.0062(12) -0.0102(12) -0.0241(14) 
C10 0.0528(14) 0.0674(15) 0.0509(14) -0.0074(11) -0.0181(11) -0.0180(12) 
C11 0.0429(12) 0.0405(11) 0.0500(13) -0.0057(9) -0.0155(10) -0.0069(10) 
C12 0.0386(11) 0.0349(11) 0.0497(12) 0.0006(9) -0.0147(10) -0.0064(9) 
C13 0.0546(14) 0.0430(12) 0.0506(13) -0.0042(10) -0.0198(11) -0.0070(11) 
C14 0.0523(14) 0.0516(13) 0.0440(12) -0.0031(10) -0.0058(11) -0.0092(11) 
C15 0.0456(13) 0.0513(13) 0.0563(14) -0.0015(11) -0.0048(11) -0.0134(11) 
C16 0.0413(12) 0.0403(11) 0.0586(14) -0.0032(10) -0.0140(11) -0.0089(10) 
C17 0.0761(18) 0.0667(17) 0.102(2) -0.0212(15) -0.0357(17) -0.0184(15) 
C18 0.0539(15) 0.094(2) 0.102(2) -0.0051(17) -0.0261(15) -0.0325(15) 
C19 0.0568(14) 0.0571(14) 0.0364(11) 0.0007(10) -0.0165(10) -0.0167(12) 
C20 0.0686(16) 0.0585(15) 0.0456(13) 0.0051(11) -0.0226(12) -0.0113(13) 
C21 0.092(2) 0.0519(14) 0.0518(14) 0.0120(11) -0.0267(14) -0.0252(15) 
C22 0.0728(17) 0.0583(14) 0.0448(13) 0.0031(11) -0.0139(12) -0.0316(14) 
C23 0.0587(14) 0.0497(13) 0.0410(12) -0.0049(10) -0.0134(11) -0.0190(11) 
C24 0.0583(14) 0.0507(13) 0.0350(11) -0.0024(9) -0.0141(10) -0.0200(11) 
C25 0.0582(15) 0.0530(13) 0.0580(14) -0.0030(11) -0.0178(12) -0.0242(12) 
C26 0.0725(17) 0.0445(13) 0.0829(18) -0.0039(12) -0.0279(15) -0.0181(13) 
C27 0.0547(15) 0.0610(16) 0.0873(19) -0.0118(13) -0.0240(14) -0.0105(13) 
C28 0.0580(15) 0.0569(14) 0.0593(15) -0.0094(11) -0.0133(12) -0.0233(12) 
C29 0.096(2) 0.096(2) 0.087(2) 0.0047(16) -0.0306(17) -0.0625(19) 
C30 0.062(2) 0.118(3) 0.191(4) -0.047(3) 0.001(2) -0.034(2) 
 
_geom_special_details 
; 
 All esds (except the esd in the dihedral angle between two l.s. planes) 
 are estimated using the full covariance matrix.  The cell esds are taken 
 into account individually in the estimation of esds in distances, angles 
 and torsion angles; correlations between esds in cell parameters are only 
 used when they are defined by crystal symmetry.  An approximate (isotropic) 
 treatment of cell esds is used for estimating esds involving l.s. planes. 
; 
 
loop_ 
 _geom_bond_atom_site_label_1 
 _geom_bond_atom_site_label_2 
 _geom_bond_distance 
 _geom_bond_site_symmetry_2 
 _geom_bond_publ_flag 
S1 O2 1.4366(15) . ? 
S1 O1 1.4328(17) . ? 
S1 N1 1.6274(17) . ? 
S1 C7 1.762(2) . ? 
S2 O3 1.4286(17) . ? 
S2 O4 1.4310(17) . ? 
S2 N2 1.6231(17) . ? 
S2 C19 1.773(2) . ? 
N1 C1 1.417(2) . ? 
N2 C6 1.424(2) . ? 
N3 C16 1.417(3) . ? 
N3 C17 1.452(3) . ? 
N3 C18 1.457(3) . ? 
N4 C28 1.417(3) . ? 
N4 C29 1.468(3) . ? 
N4 C30 1.462(4) . ? 
C1 C2 1.390(3) . ? 
C1 C6 1.394(3) . ? 
C2 C3 1.376(3) . ? 
C3 C4 1.368(3) . ? 
C4 C5 1.369(3) . ? 
C5 C6 1.383(3) . ? 
C7 C8 1.365(3) . ? 
C7 C12 1.426(3) . ? 
C8 C9 1.403(3) . ? 
C9 C10 1.351(3) . ? 
C10 C11 1.428(3) . ? 
C11 C16 1.425(3) . ? 
C11 C12 1.422(3) . ? 
C12 C13 1.429(3) . ? 
C13 C14 1.357(3) . ? 
C14 C15 1.398(3) . ? 
C15 C16 1.371(3) . ? 
C19 C20 1.364(3) . ? 
C19 C24 1.434(3) . ? 
C20 C21 1.394(3) . ? 
C21 C22 1.359(3) . ? 
C22 C23 1.412(3) . ? 
C23 C28 1.430(3) . ? 
C23 C24 1.427(3) . ? 
C24 C25 1.420(3) . ? 
C25 C26 1.361(3) . ? 
C26 C27 1.393(3) . ? 
C27 C28 1.373(3) . ? 
 
loop_ 
 _geom_angle_atom_site_label_1 
 _geom_angle_atom_site_label_2 
 _geom_angle_atom_site_label_3 
 _geom_angle 
 _geom_angle_site_symmetry_1 
 _geom_angle_site_symmetry_3 
 _geom_angle_publ_flag 
O2 S1 O1 118.65(10) . . ? 
O2 S1 N1 104.04(10) . . ? 
O1 S1 N1 109.36(9) . . ? 
O2 S1 C7 109.38(9) . . ? 
O1 S1 C7 107.27(10) . . ? 
N1 S1 C7 107.71(9) . . ? 
O3 S2 O4 118.48(10) . . ? 
O3 S2 N2 110.21(9) . . ? 
O4 S2 N2 105.18(10) . . ? 
O3 S2 C19 106.54(10) . . ? 
O4 S2 C19 111.03(10) . . ? 
N2 S2 C19 104.59(9) . . ? 
C1 N1 S1 126.08(14) . . ? 
C6 N2 S2 124.09(14) . . ? 
C16 N3 C17 115.23(17) . . ? 
C16 N3 C18 116.06(19) . . ? 
C17 N3 C18 109.92(19) . . ? 
C28 N4 C29 114.2(2) . . ? 
C28 N4 C30 115.4(2) . . ? 
C29 N4 C30 110.4(2) . . ? 
C2 C1 C6 119.59(19) . . ? 
C2 C1 N1 121.67(18) . . ? 
C6 C1 N1 118.72(17) . . ? 
C1 C2 C3 120.0(2) . . ? 
C4 C3 C2 120.2(2) . . ? 
C3 C4 C5 120.5(2) . . ? 
C6 C5 C4 120.5(2) . . ? 
C5 C6 C1 119.21(19) . . ? 
C5 C6 N2 122.60(19) . . ? 
C1 C6 N2 118.18(18) . . ? 
C8 C7 C12 121.95(19) . . ? 
C8 C7 S1 116.21(17) . . ? 
C12 C7 S1 121.80(16) . . ? 
C7 C8 C9 119.8(2) . . ? 
C10 C9 C8 120.3(2) . . ? 
C9 C10 C11 121.7(2) . . ? 
C16 C11 C12 120.27(19) . . ? 
C16 C11 C10 121.37(19) . . ? 
C12 C11 C10 118.30(19) . . ? 
C11 C12 C7 117.59(18) . . ? 
C11 C12 C13 118.50(19) . . ? 
C7 C12 C13 123.88(19) . . ? 
C14 C13 C12 119.6(2) . . ? 
C13 C14 C15 121.5(2) . . ? 
C16 C15 C14 121.6(2) . . ? 
C15 C16 C11 118.2(2) . . ? 
C15 C16 N3 123.0(2) . . ? 
C11 C16 N3 118.71(19) . . ? 
C20 C19 C24 121.3(2) . . ? 
C20 C19 S2 116.78(18) . . ? 
C24 C19 S2 121.97(16) . . ? 
C19 C20 C21 120.4(2) . . ? 
C22 C21 C20 120.3(2) . . ? 
C21 C22 C23 121.6(2) . . ? 
C22 C23 C28 121.1(2) . . ? 
C22 C23 C24 118.8(2) . . ? 
C28 C23 C24 120.00(19) . . ? 
C19 C24 C25 123.8(2) . . ? 
C19 C24 C23 117.48(18) . . ? 
C25 C24 C23 118.7(2) . . ? 
C26 C25 C24 119.5(2) . . ? 
C25 C26 C27 122.1(2) . . ? 
C28 C27 C26 121.0(2) . . ? 
C27 C28 N4 123.2(2) . . ? 
C27 C28 C23 118.6(2) . . ? 
N4 C28 C23 118.2(2) . . ? 
 
loop_ 
 _geom_torsion_atom_site_label_1 
 _geom_torsion_atom_site_label_2 
 _geom_torsion_atom_site_label_3 
 _geom_torsion_atom_site_label_4 
 _geom_torsion 
 _geom_torsion_site_symmetry_1 
 _geom_torsion_site_symmetry_2 
 _geom_torsion_site_symmetry_3 
 _geom_torsion_site_symmetry_4 
 _geom_torsion_publ_flag 
O2 S1 N1 C1 -164.34(16) . . . . ? 
O1 S1 N1 C1 -36.63(19) . . . . ? 
C7 S1 N1 C1 79.63(18) . . . . ? 
O3 S2 N2 C6 54.76(19) . . . . ? 
O4 S2 N2 C6 -176.46(16) . . . . ? 
C19 S2 N2 C6 -59.41(18) . . . . ? 
S1 N1 C1 C2 -47.2(3) . . . . ? 
S1 N1 C1 C6 134.69(18) . . . . ? 
C6 C1 C2 C3 0.8(3) . . . . ? 
N1 C1 C2 C3 -177.3(2) . . . . ? 
C1 C2 C3 C4 0.5(4) . . . . ? 
C2 C3 C4 C5 -1.3(4) . . . . ? 
C3 C4 C5 C6 0.8(4) . . . . ? 
C4 C5 C6 C1 0.5(3) . . . . ? 
C4 C5 C6 N2 -178.2(2) . . . . ? 
C2 C1 C6 C5 -1.3(3) . . . . ? 
N1 C1 C6 C5 176.86(18) . . . . ? 
C2 C1 C6 N2 177.42(19) . . . . ? 
N1 C1 C6 N2 -4.4(3) . . . . ? 
S2 N2 C6 C5 -45.9(3) . . . . ? 
S2 N2 C6 C1 135.47(17) . . . . ? 
O2 S1 C7 C8 118.15(18) . . . . ? 
O1 S1 C7 C8 -11.8(2) . . . . ? 
N1 S1 C7 C8 -129.38(17) . . . . ? 
O2 S1 C7 C12 -59.79(18) . . . . ? 
O1 S1 C7 C12 170.31(15) . . . . ? 
N1 S1 C7 C12 52.68(18) . . . . ? 
C12 C7 C8 C9 0.7(3) . . . . ? 
S1 C7 C8 C9 -177.28(17) . . . . ? 
C7 C8 C9 C10 -3.2(4) . . . . ? 
C8 C9 C10 C11 0.7(4) . . . . ? 
C9 C10 C11 C16 -178.7(2) . . . . ? 
C9 C10 C11 C12 4.2(3) . . . . ? 
C16 C11 C12 C7 176.40(17) . . . . ? 
C10 C11 C12 C7 -6.4(3) . . . . ? 
C16 C11 C12 C13 -5.6(3) . . . . ? 
C10 C11 C12 C13 171.60(18) . . . . ? 
C8 C7 C12 C11 4.2(3) . . . . ? 
S1 C7 C12 C11 -178.01(14) . . . . ? 
C8 C7 C12 C13 -173.7(2) . . . . ? 
S1 C7 C12 C13 4.1(3) . . . . ? 
C11 C12 C13 C14 1.5(3) . . . . ? 
C7 C12 C13 C14 179.36(18) . . . . ? 
C12 C13 C14 C15 2.1(3) . . . . ? 
C13 C14 C15 C16 -1.6(3) . . . . ? 
C14 C15 C16 C11 -2.5(3) . . . . ? 
C14 C15 C16 N3 -179.52(18) . . . . ? 
C12 C11 C16 C15 6.1(3) . . . . ? 
C10 C11 C16 C15 -171.0(2) . . . . ? 
C12 C11 C16 N3 -176.77(17) . . . . ? 
C10 C11 C16 N3 6.1(3) . . . . ? 
C17 N3 C16 C15 -116.1(2) . . . . ? 
C18 N3 C16 C15 14.5(3) . . . . ? 
C17 N3 C16 C11 66.9(3) . . . . ? 
C18 N3 C16 C11 -162.56(19) . . . . ? 
O3 S2 C19 C20 -4.5(2) . . . . ? 
O4 S2 C19 C20 -134.84(17) . . . . ? 
N2 S2 C19 C20 112.21(17) . . . . ? 
O3 S2 C19 C24 176.02(16) . . . . ? 
O4 S2 C19 C24 45.69(19) . . . . ? 
N2 S2 C19 C24 -67.25(18) . . . . ? 
C24 C19 C20 C21 -2.3(3) . . . . ? 
S2 C19 C20 C21 178.19(16) . . . . ? 
C19 C20 C21 C22 2.4(3) . . . . ? 
C20 C21 C22 C23 0.4(3) . . . . ? 
C21 C22 C23 C28 179.7(2) . . . . ? 
C21 C22 C23 C24 -3.0(3) . . . . ? 
C20 C19 C24 C25 178.2(2) . . . . ? 
S2 C19 C24 C25 -2.4(3) . . . . ? 
C20 C19 C24 C23 -0.3(3) . . . . ? 
S2 C19 C24 C23 179.11(15) . . . . ? 
C22 C23 C24 C19 2.9(3) . . . . ? 
C28 C23 C24 C19 -179.81(19) . . . . ? 
C22 C23 C24 C25 -175.64(19) . . . . ? 
C28 C23 C24 C25 1.6(3) . . . . ? 
C19 C24 C25 C26 -177.1(2) . . . . ? 
C23 C24 C25 C26 1.4(3) . . . . ? 
C24 C25 C26 C27 -2.6(4) . . . . ? 
C25 C26 C27 C28 0.6(4) . . . . ? 
C26 C27 C28 N4 -179.0(2) . . . . ? 
C26 C27 C28 C23 2.5(4) . . . . ? 
C29 N4 C28 C27 108.3(3) . . . . ? 
C30 N4 C28 C27 -21.3(4) . . . . ? 
C29 N4 C28 C23 -73.2(3) . . . . ? 
C30 N4 C28 C23 157.2(3) . . . . ? 
C22 C23 C28 C27 173.6(2) . . . . ? 
C24 C23 C28 C27 -3.5(3) . . . . ? 
C22 C23 C28 N4 -4.9(3) . . . . ? 
C24 C23 C28 N4 177.86(19) . . . . ? 
 
_diffrn_measured_fraction_theta_max    0.991 
_diffrn_reflns_theta_full              25.00 
_diffrn_measured_fraction_theta_full   0.991 
_refine_diff_density_max    0.250 
_refine_diff_density_min   -0.273 
_refine_diff_density_rms    0.040 
